# Supplementary material for: Abrupt recent trend changes in atmospheric nitrogen dioxide over the Middle East
Source: PubMed Central journal article supplement — Sci Adv. 2015 Aug 21;1(7):e1500498. doi: 10.1126/sciadv.1500498 (PMC4643803; doi:10.1126/sciadv.1500498), 2015-08-21
Supplement: 1500498_SM.pdf [file 1500498_SM.pdf]

## Supplementary Materials for

### **Abrupt recent trend changes in atmospheric nitrogen dioxide over the Middle East**

Jos Lelieveld, Steffen Beirle, Christoph Hörmann, Georgiy Stenchikov, Thomas Wagner

Published 21 August 2015, *Sci. Adv.* **1**, e1500498 (2015)

DOI: 10.1126/sciadv.1500498

#### **This PDF file includes:**

Fig. S1. NO<sub>2</sub> column densities over 18 cities in the Middle East.

Fig. S2. Tropospheric NO<sub>2</sub> column density changes in 10<sup>15</sup> molecules/cm<sup>2</sup> between 2005 and 2014.

## Supplementary Materials

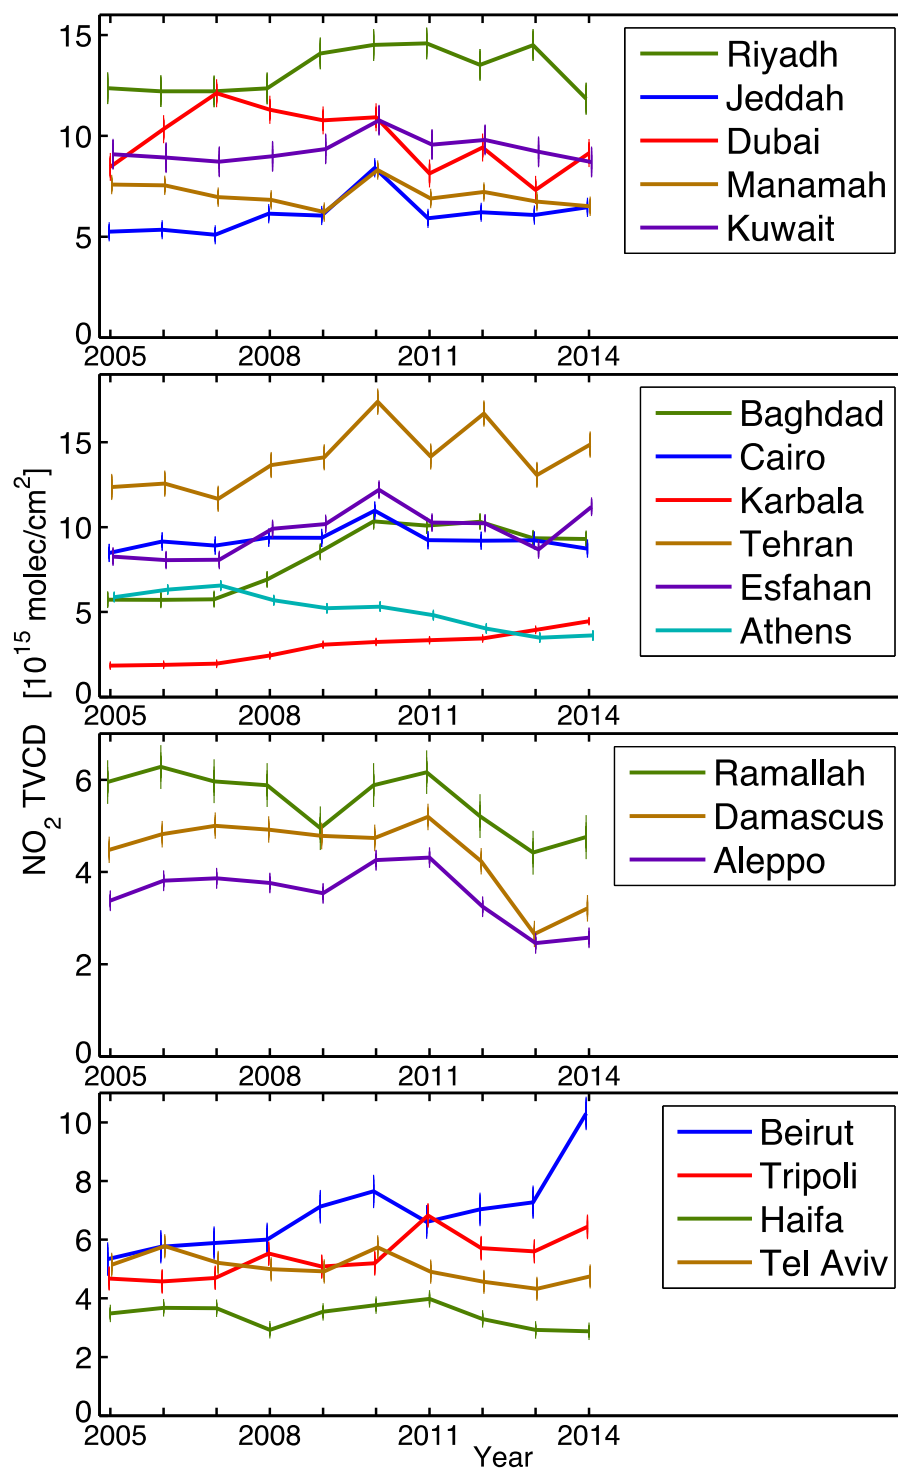

**Fig. S1.**  $\text{NO}_2$  column densities over 18 cities in the Middle East. Annual mean  $\text{NO}_2$  during 2005 – 2014, indicating  $\text{NO}_x$  emission trend changes around 2010. The surface area considered is  $30 \times 30 \text{ km}^2$  (cf.  $100 \times 100 \text{ km}^2$  in Fig. 2). Vertical bars represent the standard error of the mean.

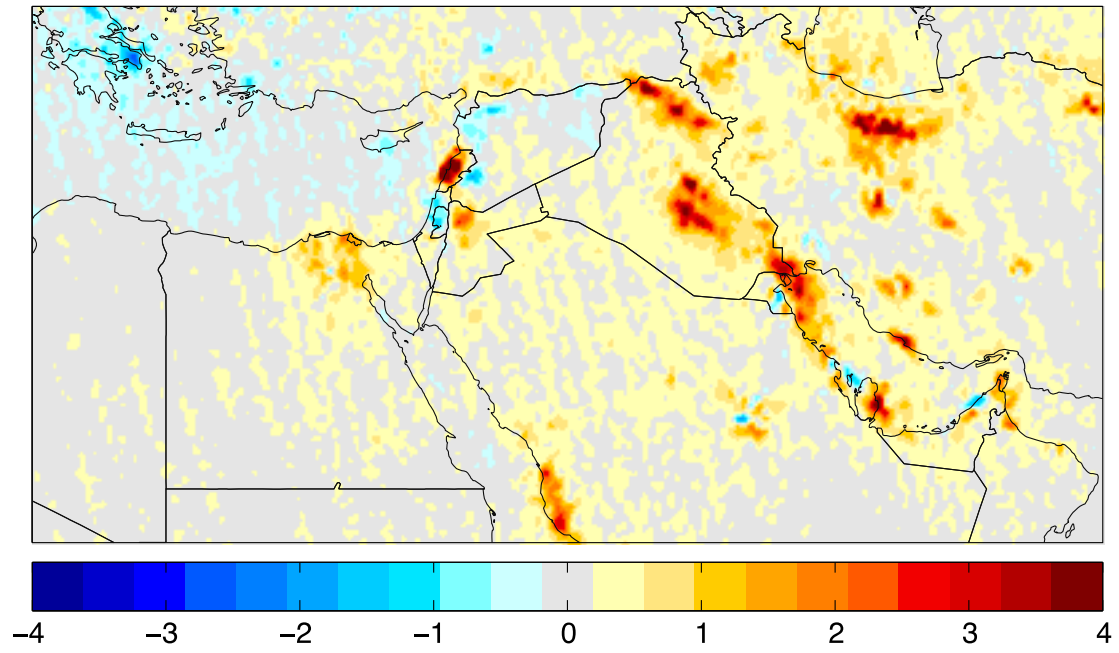

**Fig. S2.** Tropospheric NO<sub>2</sub> column density changes in 10<sup>15</sup> molecules/cm<sup>2</sup> between 2005 and 2014.
